# Supplementary material for: Human Inhalation Exposure to Aerosol and Health Effect: Aerosol Monitoring and Modelling Regional Deposited Doses
Source: MDPI journal article supplement (doi:10.3390/ijerph17061923), 2020-03-16

# Supplemental Material

File S1. the result of the survey.

## SURVEY

|                  |                               |                                |
|------------------|-------------------------------|--------------------------------|
| <b>Building</b>  | Type                          |                                |
|                  | Address                       |                                |
|                  | Age                           |                                |
|                  | Area                          | m <sup>2</sup>                 |
|                  | Total floor                   |                                |
|                  | Windows                       | Number of windows we can open: |
|                  |                               | Area: m <sup>2</sup>           |
| Number of people | Student:<br>Teacher:          |                                |
| <b>People</b>    | Age                           |                                |
|                  | Sex                           |                                |
|                  | Education                     |                                |
|                  | Working type                  |                                |
|                  | Pattern of life               |                                |
|                  | Exercise                      |                                |
|                  | Allergy                       |                                |
|                  | Opinion of indoor air quality |                                |
|                  | Others                        |                                |

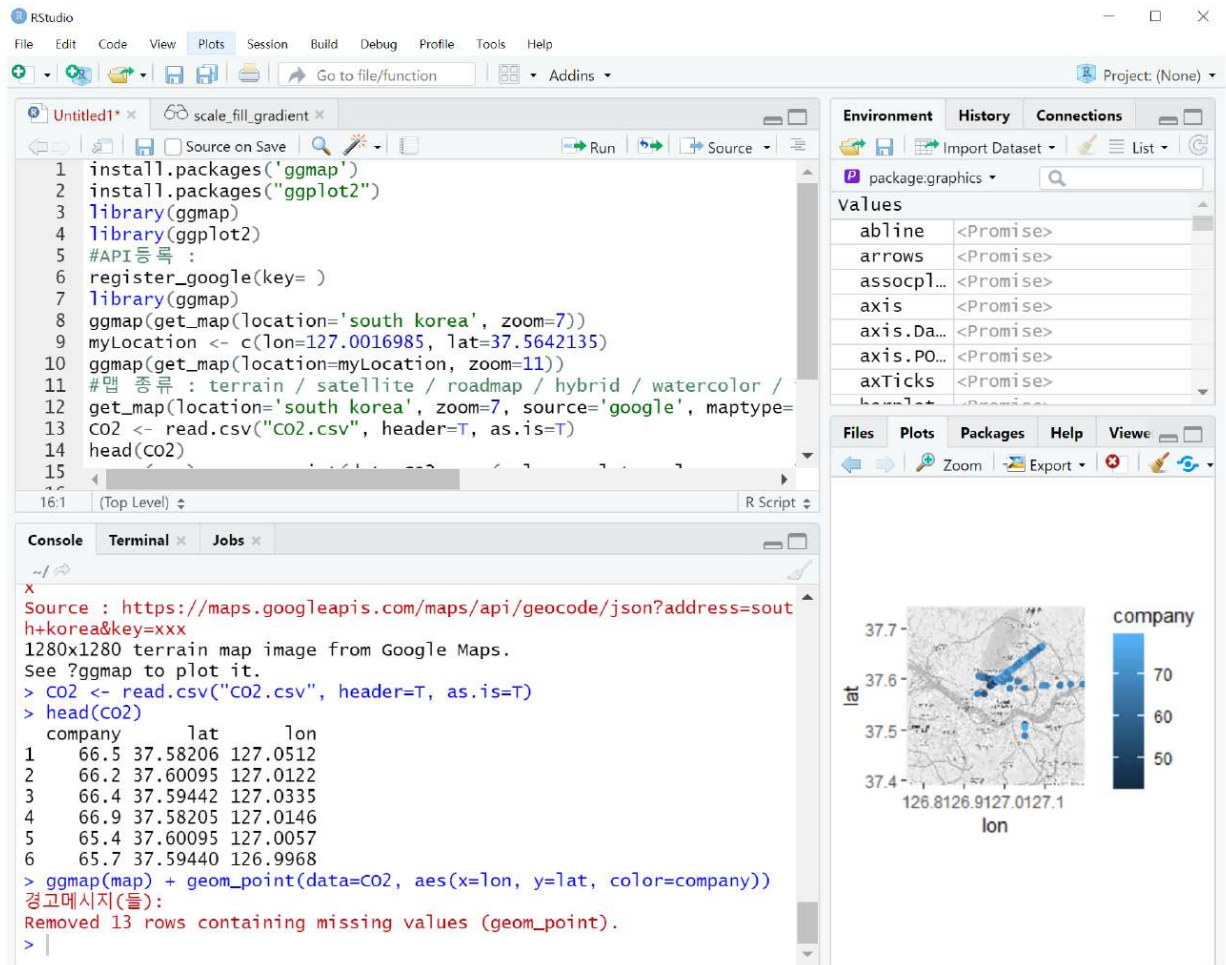

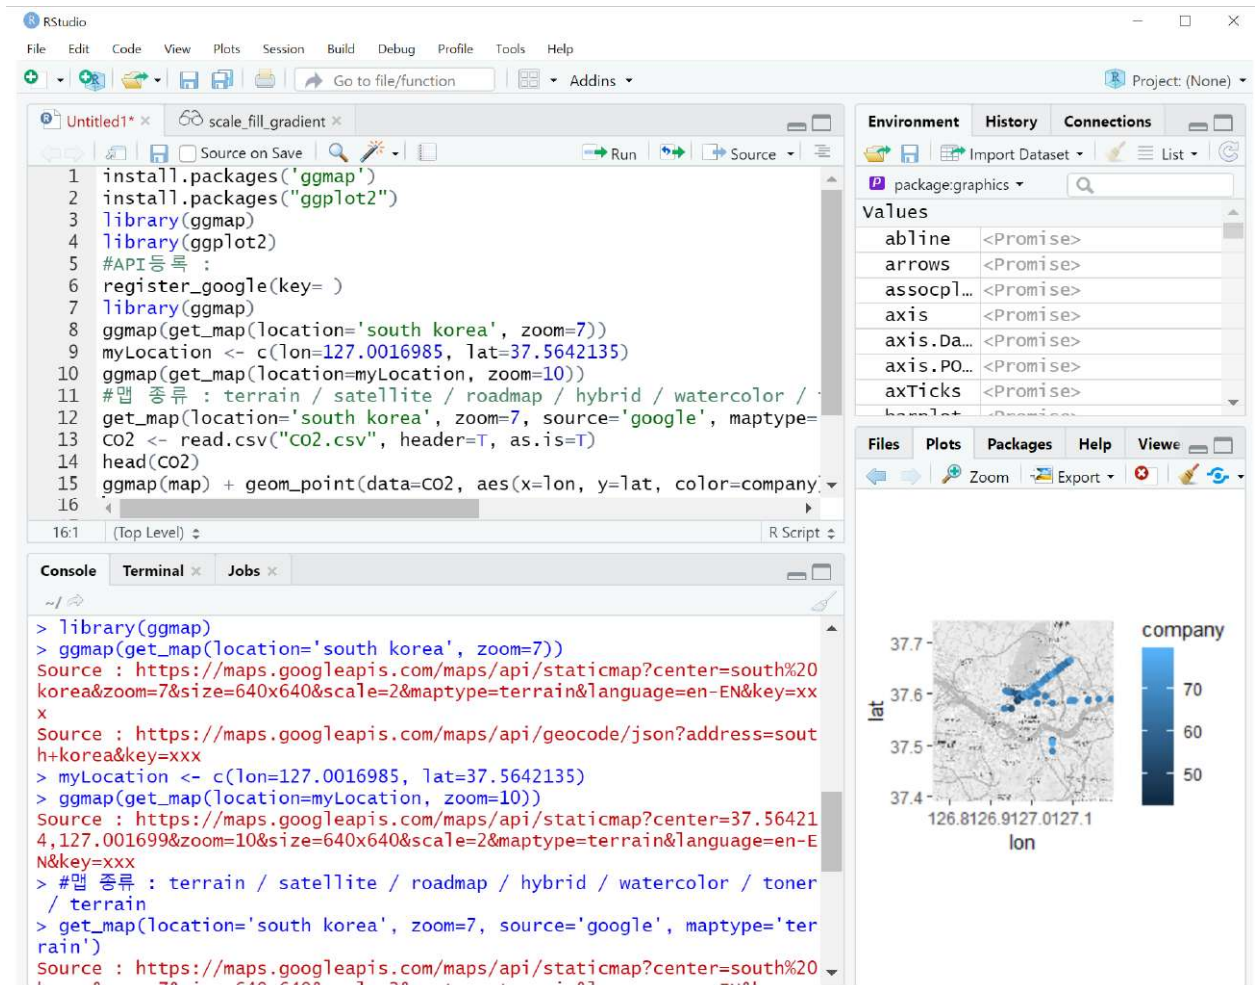

Supplement: s1 [file s1]
